# Supplementary material for: Degradation of Blos1 mRNA by IRE1 repositions lysosomes and protects cells from stress
Source: PubMed Central journal article supplement — J Cell Biol. 2019 Feb 20;218(4):1118–27. doi: 10.1083/jcb.201809027 (PMC6446841; doi:10.1083/jcb.201809027), 2019-02-20
Supplement: JCB_201809027_sm.pdf [file JCB_201809027_sm.pdf]

## Supplemental material

Bae et al., <https://doi.org/10.1083/jcb.201809027>

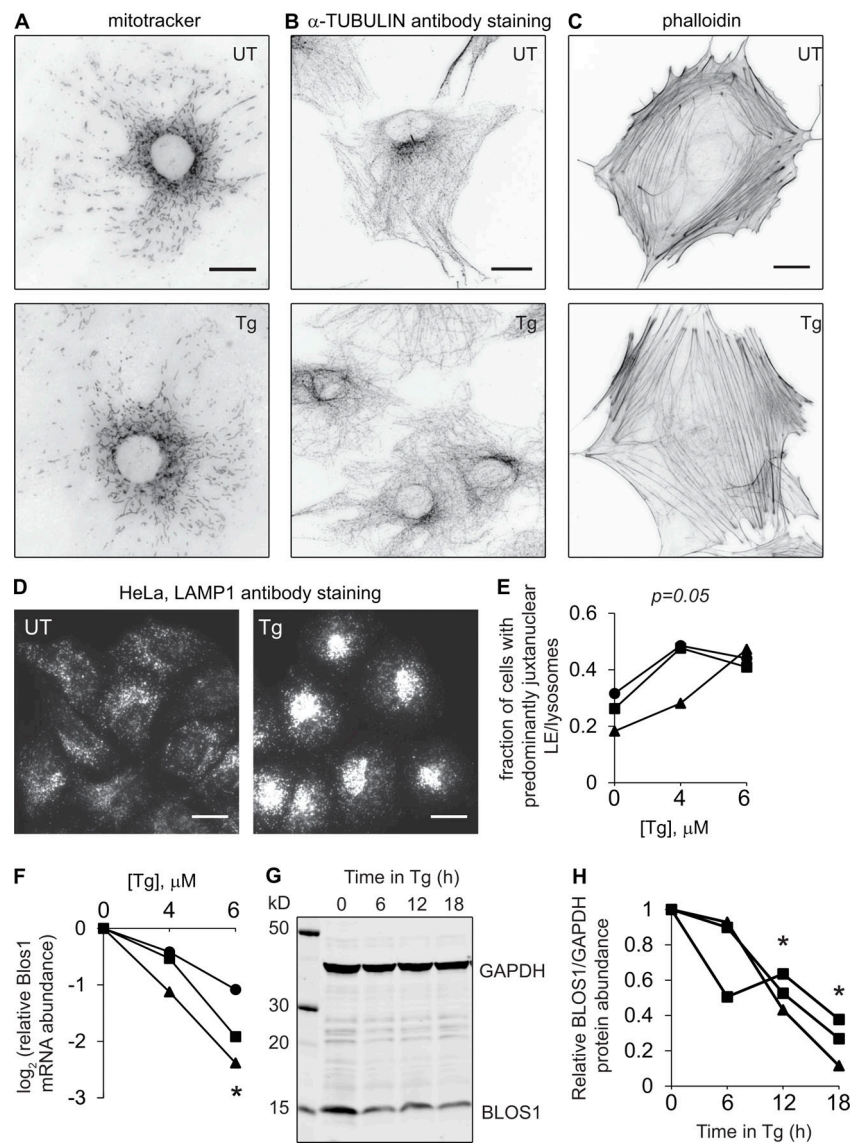

Figure S1. **Organelle labeling during ER stress and LE/lysosome repositioning in HeLa cells.** (A–C) We treated MC3T3-E1 cells with Tg (2  $\mu$ M, 18 h), then stained with mitotracker (A) or phalloidin (C) or fixed and stained for  $\alpha$ -tubulin (B). (D–F) We treated HeLa cells with Tg (18 h), and then fixed and stained with a LAMP1 antibody and collected RNA samples in parallel. We imaged and scored cells for juxtannuclear lysosome clustering (D and E) and measured *Blos1* mRNA levels by qPCR (F) for three independent experiments. (G and H) We treated HeLa cells with 6  $\mu$ M Tg, collected samples over time, and analyzed by immunoblotting. G is a representative blot and H shows quantification of three independent experiments. Symbols represent independent experiments and are maintained between E and F; lines connect data from the same replicate experiment. We determined P values for E, F, and H using ANOVA followed by Tukey's honestly significant difference test,  $n = 3$ . \* $P < 0.05$  for stressed versus UT cells. Scale bars, 10  $\mu$ m. UT, untreated.

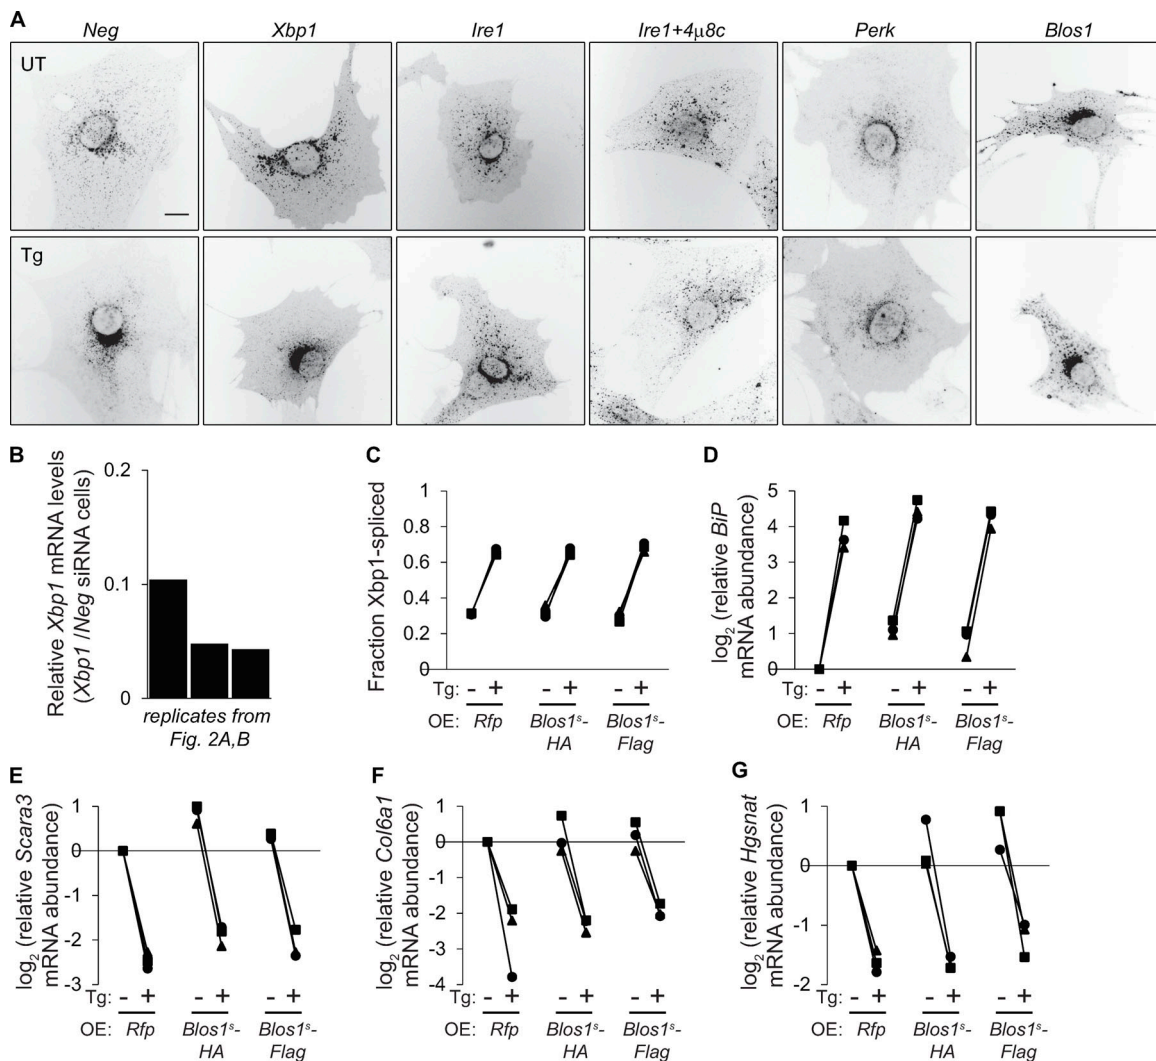

Figure S2. **LE/lysosome repositioning during ER stress is dependent on the degradation of Bloss1 mRNA by RIDD.** (A) Representative images from the experiments described in Fig. 2, A and B. Scale bar, 10  $\mu$ m. (B) We used RNA samples from Fig. 2 B to measure relative *Xbp1* mRNA levels by qPCR. (C) We used RNA samples from Fig. 2 D to measure *Xbp1* splicing by PCR, as described in Materials and methods. (D–G) We used RNA samples from Fig. 2 D to measure mRNA levels of various ER stress–responsive genes by qPCR. B–G show three independent experiments. UT, untreated; OE, overexpressed.

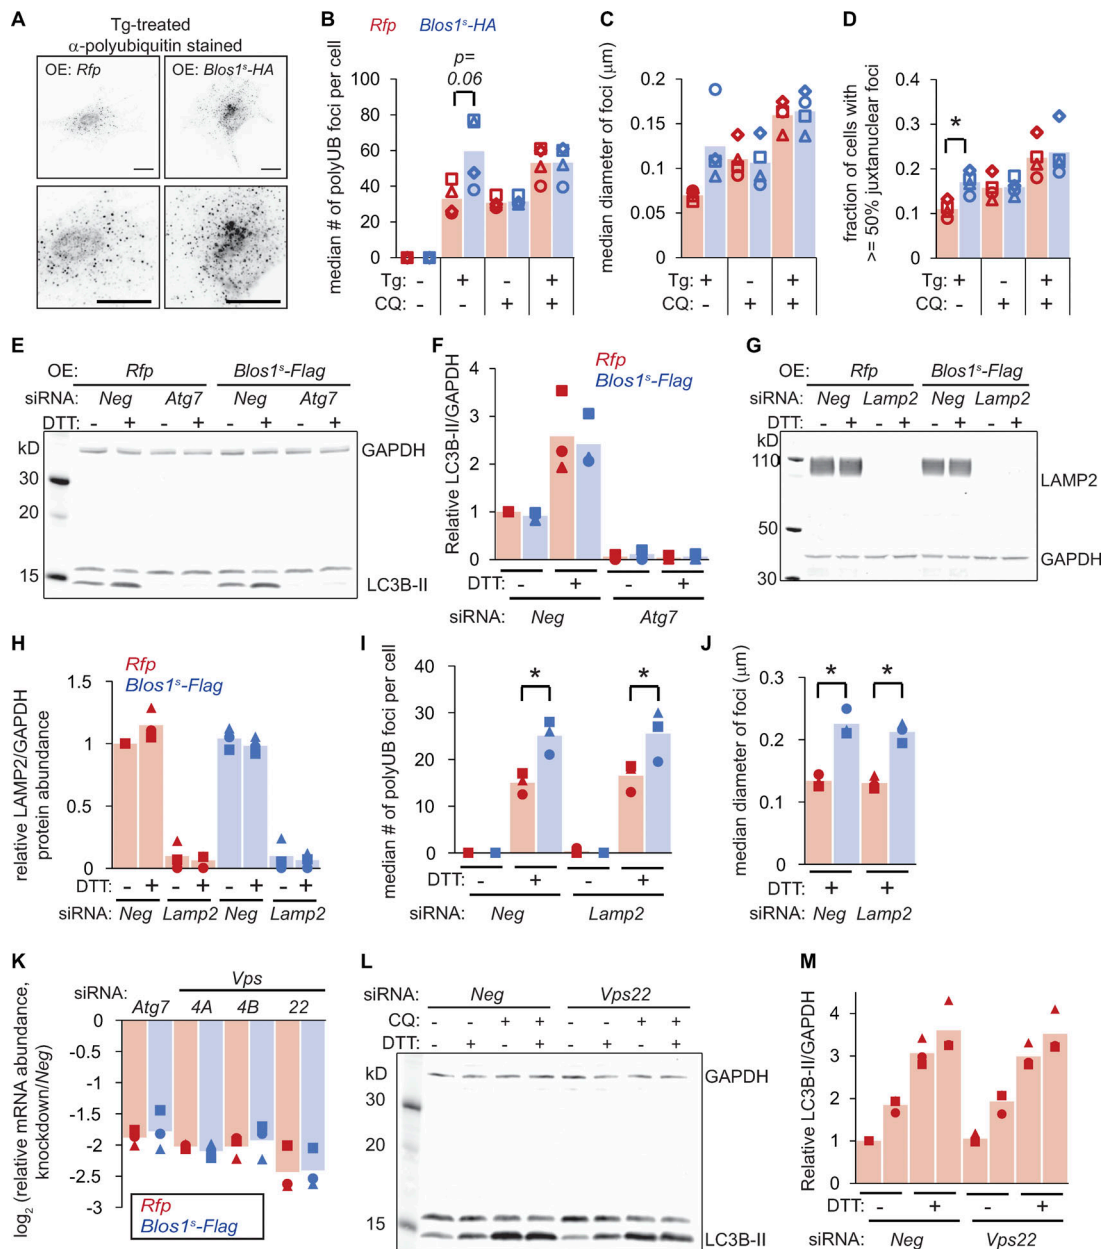

Figure S3. **Mechanisms of protein aggregate clearance during ER stress.** (A–D) We treated MC3T3-E1 cells stably expressing the indicated mRNAs with Tg (2  $\mu\text{M}$ , 18 h)  $\pm$  CQ (120  $\mu\text{M}$ ) for the final 2 h of treatment. We then fixed and stained cells with an antibody for polyubiquitin and analyzed foci as described in Materials and methods. Panel A shows representative images (inverted, scale bar = 10  $\mu\text{m}$ ), and B–D show four independent experiments. \* $P < 0.05$ , paired  $t$  test comparing *Rfp*- versus *Blos1<sup>s</sup>*-expressing cell lines, corrected for multiple comparisons within each panel ( $P$  values between 0.05 and 0.15 are also shown). (E and F) We transfected cells with *Atg7* or *Neg* control siRNAs, then treated with DTT (2 mM, 4 h) and analyzed LC3B-II by immunoblotting. E shows a representative blot and F shows quantification of three independent experiments. (G–J) We transfected cells with *Lamp2* or *Neg* control siRNAs, then treated with DTT (2 mM, 4 h) and analyzed LAMP2 levels by immunoblotting (G and H) or polyubiquitin foci by immunostaining (I and J). The legend in H also applies to I and J. (K) We collected RNA samples from knockdown experiments in Fig. 5 I and measured target mRNA levels by qPCR. (L and M) We transfected *Rfp*-expressing control cells with *Vps22* or *Neg* control siRNAs, then treated with 2 mM DTT  $\pm$  120  $\mu\text{M}$  CQ (4 h) and analyzed LC3B-II as in E and F. For F–M: \* $P < 0.05$  for *Rfp* versus *Blos1<sup>s</sup>* cells, using paired  $t$  tests with corrections for multiple comparisons;  $n = 3$ . polyUB, polyubiquitin; OE, overexpressed.
